# Supplementary material
Source: Springer Nature journal article supplement (https://www.springermedizin.de/resource/supplementary/12879_2011_1691_MOESM1_ESM.pdf/9443946)

**a/**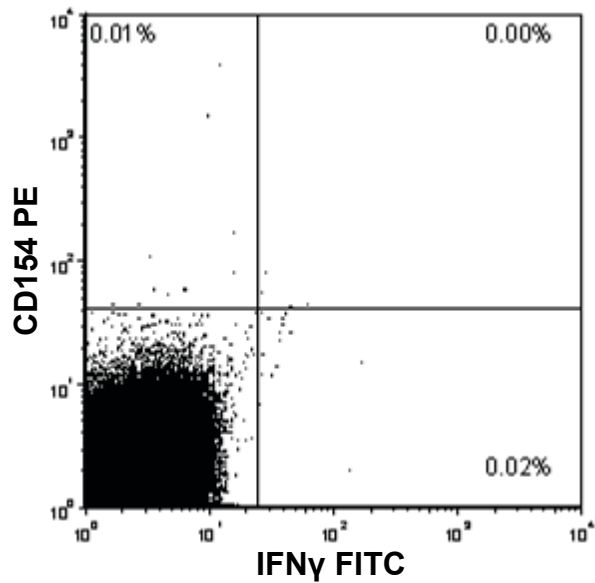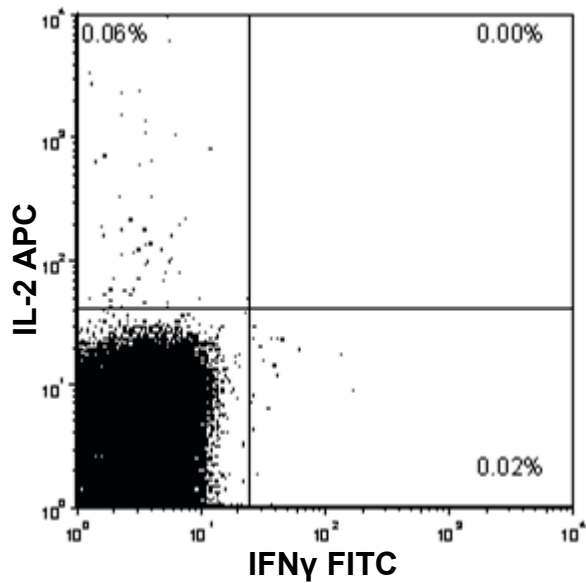**b/**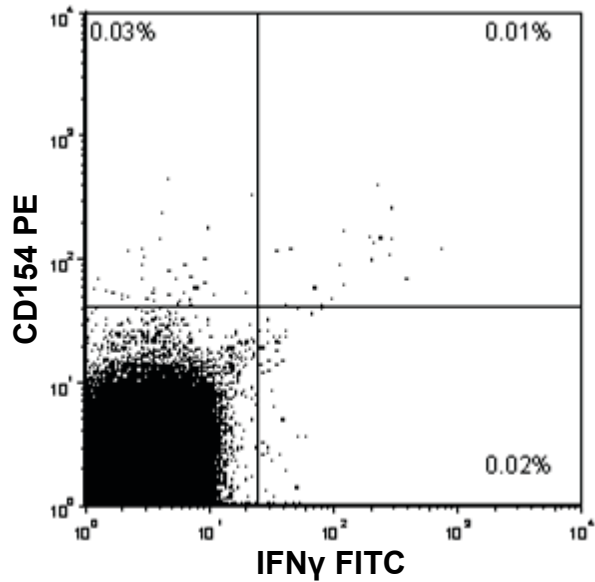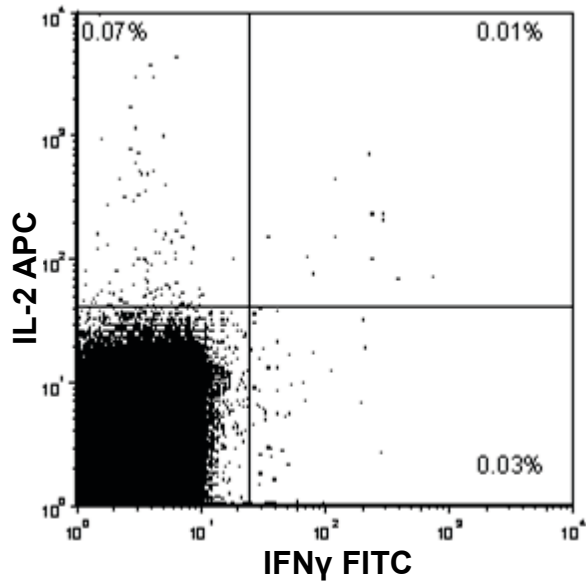

Supplement: MOESM1 [file 9443946]
